# Supplementary material for: Detection of terrestrial mammals using environmental DNA during heavy rainfall events and associated influencing factors
Source: PeerJ. 2025 Oct 15;13:e20166. doi: 10.7717/peerj.20166 (PMC12535231; doi:10.7717/peerj.20166)
Supplement: Supplemental Information 4 [file peerj-13-20166-s004.xlsx]

## Sheet: Sheet1
Sample	Turbidity(ppm)	Electrical Conductivity(μS/cm)	pH	Water Temperature（°C）	Land uses (%)			Sampling site		eDNA source		Land distance (m)	Waterwasy distance (m)	eDNA Concentration (copies/L)		double-stranded DNA (ng/μL)				Sampling time
					forest	farmland	urban	Latitude	Longitude	Latitude	Longitude			GF/F	GF/D	GF/F		GF/D	GF/D
																replication1	replication2	replication1	replication2
2021_9_Tagami_Sampling1	-	-	-	-	10.85	43.24	21.38	31.838143°N	131.417732°E	31.839116°N	131.413398°E	311	187	1601.47	-	-	-	-	-	15:00:00
2021_9_Tagami_Sampling2	-	-	-	-	10.85	43.24	21.38	31.838143°N	131.417732°E	31.839116°N	131.413398°E	311	187	1849.29	-	-	-	-	-	17:00:00
2021_9_Irrigation_Sampling1	-	-	-	-	10.85	43.24	21.38	31.839362°N	131.414762°E	31.839116°N	131.413398°E	17	134	855.367	4943.83	-	-	-	-	15:15:00
2021_9_Irrigation_Sampling2	-	-	-	-	10.85	43.24	21.38	31.839362°N	131.414762°E	31.839116°N	131.413398°E	17	134	8267.8	-	-	-	-	-	17:15:00
2021_11_Mizunashi_Sampling1	55.2	111.6	7.37	-	71.57	12.19	3.07	31.829925°N	131.362669°E	31.828235°N	131.359762°E	125	360	0	0	-	-	-	-	10:00:00
2021_11_Mizunashi_Sampling2	5.78	119.3	7.37	-	71.57	12.19	3.07	31.829925°N	131.362669°E	31.828235°N	131.359762°E	125	360	374.697	0	-	-	-	-	12:00:00
2021_11_Tagami_Sampling1	6.72	119.4	7.25	-	10.85	43.24	21.38	31.838143°N	131.417732°E	31.839116°N	131.413398°E	311	187	1150.85	149.981	-	-	-	-	11:40:00
2021_11_Tagami_Sampling2	4.07	126.6	7.27	-	10.85	43.24	21.38	31.838143°N	131.417732°E	31.839116°N	131.413398°E	311	187	850.381	175.09	-	-	-	-	13:40:00
2021_11_Irrigation_Sampling1	0.96	164.7	7.18	-	10.85	43.24	21.38	31.839362°N	131.414762°E	31.839116°N	131.413398°E	17	134	1350.6	274.944	-	-	-	-	11:15:00
2021_11_Irrigation_Sampling2	0.45	166.2	7.08	-	10.85	43.24	21.38	31.839362°N	131.414762°E	31.839116°N	131.413398°E	17	134	1201.13	174.94	-	-	-	-	13:15:00
2022_5_Mizunashi_Sampling1	19.3	53.6	7.96	14.9	71.57	12.19	3.07	31.829925°N	131.362669°E	31.828235°N	131.359762°E	125	360	274.248	250.01	5.9	8.5	3.21	-	13:23:00
2022_5_Mizunashi_Sampling2	25.38	61.1	7.91	17.7	71.57	12.19	3.07	31.829925°N	131.362669°E	31.828235°N	131.359762°E	125	360	369.468	275.113	3.37	5.6	5	1.3	15:28:00
2022_5_Oka_Sampling1	174.52	76.7	7.44	19.7	39.25	31.25	8.55	31.85162°N	131.386959°E	31.852260°N	131.385643°E	36	180	1555.1	802.969	2.61	3.27	7.4	6.2	13:47:00
2022_5_Oka_Sampling2	46.73	71.3	7.18	18.4	39.25	31.25	8.55	31.85162°N	131.386959°E	31.852260°N	131.385643°E	36	180	1571.45	3081.15	1.35	-	3.32	12	15:46:00
2022_9_Oka_Sampling1	63.25	55.7	7.7	21.6	39.25	31.25	8.55	31.85162°N	131.386959°E	31.852260°N	131.385643°E	36	180	124.902	0	4.47	1.01	0.727	1..69	07:36:00
2022_9_Tagami_Sampling1	16.72	67.3	7.11	24.2	10.85	43.24	21.38	31.838143°N	131.417732°E	31.839116°N	131.413398°E	311	187	2729.6	400.11	37	34	12	18	08:20:00
2022_11_Mizunashi_Sampling1	45.12	98.2	7.87	18	71.57	12.19	3.07	31.829925°N	131.362669°E	31.828235°N	131.359762°E	125	360	11228	4807.06	5.4	5.2	4.06	2.62	07:30:00
2022_11_Tagami_Sampling1	138.54	39.8	7.18	19	10.85	43.24	21.38	31.838143°N	131.417732°E	31.839116°N	131.413398°E	311	187	399185	231938	14	13	14	13	08:40:00
2022_11_Irrigation_Sampling1	189.94	25.8	7.33	19	10.85	43.24	21.38	31.839362°N	131.414762°E	31.839116°N	131.413398°E	17	134	23527.1	17532.6	35	32	33	11	08:21:00
2023_6_Mizunashi_Sampling1	285.82	-	7.72	17.9	71.57	12.19	3.07	31.829925°N	131.362669°E	31.828235°N	131.359762°E	125	360	636.722	593.662	20	1.96	21	16	07:29:00
2023_6_Mizunashi_Sampling2	110.31	56.6	6.61	18	71.57	12.19	3.07	31.829925°N	131.362669°E	31.828235°N	131.359762°E	125	360	563.096	1041.09	9.6	13	18	20	09:54:00
2023_6_Oka_Sampling1	314.34	-	7.47	20.9	39.25	31.25	8.55	31.85162°N	131.386959°E	31.852260°N	131.385643°E	36	180	600.067	150.031	0.697	0.575	2.47	3.33	07:51:00
2023_6_Oka_Sampling2	112.33	67.1	6.09	21	39.25	31.25	8.55	31.85162°N	131.386959°E	31.852260°N	131.385643°E	36	180	217.687	267.691	3.58	3.04	2.07	1.85	10:14:00
2023_6_Tagami_Sampling1	12.77	-	6.9	21	10.85	43.24	21.38	31.838143°N	131.417732°E	31.839116°N	131.413398°E	311	187	214.363	98.5	21	28	12	6.9	08:42:00
2023_6_Tagami_Sampling2	7.43	76.7	5.98	21	10.85	43.24	21.38	31.838143°N	131.417732°E	31.839116°N	131.413398°E	311	187	324.994	0	28	32	11	9	11:01:00
